# Supplementary material for: Genome-Wide Microarrray Analysis Reveals Roles for the REF-1 Family Member HLH-29 in Ferritin Synthesis and Peroxide Stress Response
Source: PLoS One. 2013 Mar 22;8(3):e59719. doi: 10.1371/journal.pone.0059719 (PMC3606163; doi:10.1371/journal.pone.0059719)
Supplement: Table S2 — Gene Ontology (GO) of genes affected in hlh-29 mutants. Excel spreadsheet. (XLSX) [file pone.0059719.s005.xlsx]

## Sheet: Table S2 HLH-29 DAVID Clusters
Table S2: DAVID Annotations Clusters for HLH-29 Target Genes
Annotation Cluster 1	Enrichment Score: 4.323562044662806
Category	Term	Count	%	PValue	Genes	List Total	Pop Hits	Pop Total	Fold Enrichment	Bonferroni	Benjamini	FDR
GOTERM_BP_FAT	GO:0008340~determination of adult life span	14	5.46875	4.7472e-05	194142_X_AT,188971_S_AT,190353_S_AT,192617_AT,188137_S_AT,192323_AT,188453_AT,190978_AT,180913_AT,190427_S_AT,173335_S_AT,187084_AT,172744_AT,189457_AT,173301_S_AT	115	243	7838	3.92671	0.0176915	0.0176915	0.0655979
GOTERM_BP_FAT	GO:0007568~aging	14	5.46875	4.7472e-05	194142_X_AT,188971_S_AT,190353_S_AT,192617_AT,188137_S_AT,192323_AT,188453_AT,190978_AT,180913_AT,190427_S_AT,173335_S_AT,187084_AT,172744_AT,189457_AT,173301_S_AT	115	243	7838	3.92671	0.0176915	0.0176915	0.0655979
GOTERM_BP_FAT	GO:0010259~multicellular organismal aging	14	5.46875	4.7472e-05	194142_X_AT,188971_S_AT,190353_S_AT,192617_AT,188137_S_AT,192323_AT,188453_AT,190978_AT,180913_AT,190427_S_AT,173335_S_AT,187084_AT,172744_AT,189457_AT,173301_S_AT	115	243	7838	3.92671	0.0176915	0.0176915	0.0655979
				4.7472e-05
Annotation Cluster 2	Enrichment Score: 3.384770005035233
Category	Term	Count	%	PValue	Genes	List Total	Pop Hits	Pop Total	Fold Enrichment	Bonferroni	Benjamini	FDR
INTERPRO	IPR008574:Protein of unknown function DUF856, Caenorhabditis species	4	1.5625	8.13499e-05	179892_AT,181130_S_AT,172229_X_AT,186021_S_AT	185	7	13633	42.1097	0.0271228	0.00912392	0.110627
PIR_SUPERFAMILY	PIRSF016383:DUF856_CAE_spp	4	1.5625	0.000320417	179892_AT,181130_S_AT,172229_X_AT,186021_S_AT	99	7	4541	26.2107	0.0324694	0.0324694	0.357039
PIR_SUPERFAMILY	PIRSF016383:uncharacterized conserved protein	3	1.17188	0.00268917	179892_AT,181130_S_AT,186021_S_AT	99	4	4541	34.4015	0.242216	0.129492	2.96073
				0.00103031					34.2406
Annotation Cluster 3	Enrichment Score: 3.3059978867047817
Category	Term	Count	%	PValue	Genes	List Total	Pop Hits	Pop Total	Fold Enrichment	Bonferroni	Benjamini	FDR
INTERPRO	IPR005804:Fatty acid desaturase, type 1	5	1.95312	3.83855e-06	193726_AT,187997_S_AT,192186_AT,187910_AT,192357_AT	185	9	13633	40.9399	0.00129659	0.00129659	0.00522255
GOTERM_MF_FAT	GO:0016717~oxidoreductase activity, acting on paired donors, with oxidation of a pair of donors resulting in the reduction of molecular oxygen to two molecules of water	4	1.5625	3.89386e-05	193726_AT,187997_S_AT,187910_AT,192357_AT	108	5	6686	49.5259	0.00783491	0.00783491	0.0488741
GOTERM_BP_FAT	GO:0046394~carboxylic acid biosynthetic process	7	2.73438	0.000181403	193726_AT,187997_S_AT,192186_AT,190094_S_AT,186734_S_AT,187910_AT,192357_AT	115	58	7838	8.22579	0.0659393	0.0135501	0.250452
GOTERM_BP_FAT	GO:0016053~organic acid biosynthetic process	7	2.73438	0.000181403	193726_AT,187997_S_AT,192186_AT,190094_S_AT,186734_S_AT,187910_AT,192357_AT	115	58	7838	8.22579	0.0659393	0.0135501	0.250452
GOTERM_BP_FAT	GO:0006633~fatty acid biosynthetic process	5	1.95312	0.00042412	193726_AT,187997_S_AT,192186_AT,187910_AT,192357_AT	115	25	7838	13.6313	0.147432	0.0197404	0.584645
GOTERM_BP_FAT	GO:0006631~fatty acid metabolic process	6	2.34375	0.000561754	193726_AT,192195_AT,187997_S_AT,192186_AT,187910_AT,192357_AT	115	47	7838	8.70083	0.190452	0.023202	0.773689
GOTERM_BP_FAT	GO:0006636~unsaturated fatty acid biosynthetic process	3	1.17188	0.00419859	193726_AT,192186_AT,187910_AT	115	7	7838	29.2099	0.794435	0.0941437	5.6498
GOTERM_BP_FAT	GO:0033559~unsaturated fatty acid metabolic process	3	1.17188	0.00554507	193726_AT,192186_AT,187910_AT	115	8	7838	25.5587	0.876406	0.115723	7.39801
GOTERM_BP_FAT	GO:0008610~lipid biosynthetic process	5	1.95312	0.0645854	193726_AT,187997_S_AT,192186_AT,187910_AT,192357_AT	115	104	7838	3.27676	1	0.532671	60.2619
				0.00841339					20.8106
Annotation Cluster 4	Enrichment Score: 2.7481620600360928
Category	Term	Count	%	PValue	Genes	List Total	Pop Hits	Pop Total	Fold Enrichment	Bonferroni	Benjamini	FDR
SP_PIR_KEYWORDS	nucleosome core	6	2.34375	2.38255e-06	172871_X_AT,172685_X_AT,190307_S_AT,172823_X_AT,172874_X_AT,172761_X_AT,192280_S_AT,172899_X_AT,172891_X_AT,172702_X_AT,172851_X_AT,172758_X_AT	251	18	19674	26.1275	0.000302538	0.000302538	0.00276302
INTERPRO	IPR007125:Histone core	6	2.34375	4.23012e-06	172871_X_AT,172685_X_AT,190307_S_AT,172823_X_AT,172874_X_AT,172761_X_AT,192280_S_AT,172899_X_AT,172891_X_AT,172702_X_AT,172851_X_AT,172758_X_AT	185	19	13633	23.2711	0.00142876	0.000714636	0.00575528
GOTERM_CC_FAT	GO:0000786~nucleosome	6	2.34375	2.39617e-05	172871_X_AT,172685_X_AT,190307_S_AT,172823_X_AT,172874_X_AT,172761_X_AT,192280_S_AT,172899_X_AT,172891_X_AT,172702_X_AT,172851_X_AT,172758_X_AT	95	30	7912	16.6568	0.00126918	0.000634792	0.0233758
GOTERM_CC_FAT	GO:0032993~protein-DNA complex	6	2.34375	3.87994e-05	172871_X_AT,172685_X_AT,190307_S_AT,172823_X_AT,172874_X_AT,172761_X_AT,192280_S_AT,172899_X_AT,172891_X_AT,172702_X_AT,172851_X_AT,172758_X_AT	95	33	7912	15.1426	0.00205429	0.000685234	0.0378482
GOTERM_BP_FAT	GO:0006334~nucleosome assembly	6	2.34375	8.77202e-05	172871_X_AT,172685_X_AT,190307_S_AT,172823_X_AT,172874_X_AT,172761_X_AT,192280_S_AT,172899_X_AT,172891_X_AT,172702_X_AT,172851_X_AT,172758_X_AT	115	32	7838	12.7793	0.0324462	0.0163569	0.121182
GOTERM_BP_FAT	GO:0031497~chromatin assembly	6	2.34375	8.77202e-05	172871_X_AT,172685_X_AT,190307_S_AT,172823_X_AT,172874_X_AT,172761_X_AT,192280_S_AT,172899_X_AT,172891_X_AT,172702_X_AT,172851_X_AT,172758_X_AT	115	32	7838	12.7793	0.0324462	0.0163569	0.121182
GOTERM_BP_FAT	GO:0034728~nucleosome organization	6	2.34375	8.77202e-05	172871_X_AT,172685_X_AT,190307_S_AT,172823_X_AT,172874_X_AT,172761_X_AT,192280_S_AT,172899_X_AT,172891_X_AT,172702_X_AT,172851_X_AT,172758_X_AT	115	32	7838	12.7793	0.0324462	0.0163569	0.121182
GOTERM_BP_FAT	GO:0065004~protein-DNA complex assembly	6	2.34375	0.000179195	172871_X_AT,172685_X_AT,190307_S_AT,172823_X_AT,172874_X_AT,172761_X_AT,192280_S_AT,172899_X_AT,172891_X_AT,172702_X_AT,172851_X_AT,172758_X_AT	115	37	7838	11.0524	0.0651631	0.0167047	0.247406
SP_PIR_KEYWORDS	chromosomal protein	6	2.34375	0.000206572	172871_X_AT,172685_X_AT,190307_S_AT,172823_X_AT,172874_X_AT,172761_X_AT,192280_S_AT,172899_X_AT,172891_X_AT,172702_X_AT,172851_X_AT,172758_X_AT	251	43	19674	10.9371	0.0258962	0.00653789	0.239301
UP_SEQ_FEATURE	cross-link:Glycyl lysine isopeptide (Lys-Gly) (interchain with G-Cter in ubiquitin)	4	1.5625	0.0002556	172685_X_AT,172823_X_AT,172874_X_AT,192280_S_AT,172891_X_AT,172702_X_AT,172851_X_AT,172758_X_AT	57	8	3249	28.5	0.048383	0.048383	0.318302
GOTERM_BP_FAT	GO:0006323~DNA packaging	6	2.34375	0.000330052	172871_X_AT,172685_X_AT,190307_S_AT,172823_X_AT,172874_X_AT,172761_X_AT,192280_S_AT,172899_X_AT,172891_X_AT,172702_X_AT,172851_X_AT,172758_X_AT	115	42	7838	9.73665	0.116726	0.0204742	0.455248
GOTERM_BP_FAT	GO:0006325~chromatin organization	8	3.125	0.00036205	172685_X_AT,172823_X_AT,192280_S_AT,172758_X_AT,188453_AT,172871_X_AT,190307_S_AT,172761_X_AT,172874_X_AT,172899_X_AT,187818_S_AT,172851_X_AT,172702_X_AT,172891_X_AT	115	92	7838	5.92665	0.127293	0.0192628	0.499281
GOTERM_CC_FAT	GO:0000785~chromatin	6	2.34375	0.000462863	172871_X_AT,172685_X_AT,190307_S_AT,172823_X_AT,172874_X_AT,172761_X_AT,192280_S_AT,172899_X_AT,172891_X_AT,172702_X_AT,172851_X_AT,172758_X_AT	95	55	7912	9.08555	0.0242388	0.00611558	0.450679
INTERPRO	IPR009072:Histone-fold	5	1.95312	0.000668848	172871_X_AT,172685_X_AT,172823_X_AT,172874_X_AT,192280_S_AT,172899_X_AT,172891_X_AT,172702_X_AT,172851_X_AT,172758_X_AT	185	30	13633	12.282	0.202399	0.0442217	0.906198
GOTERM_BP_FAT	GO:0051276~chromosome organization	9	3.51562	0.000994821	172685_X_AT,172823_X_AT,192280_S_AT,172758_X_AT,188453_AT,172871_X_AT,190307_S_AT,172761_X_AT,172874_X_AT,193857_S_AT,172899_X_AT,187818_S_AT,172851_X_AT,172702_X_AT,172891_X_AT	115	141	7838	4.35042	0.312187	0.0367323	1.36635
GOTERM_BP_FAT	GO:0006333~chromatin assembly or disassembly	6	2.34375	0.00106834	172871_X_AT,172685_X_AT,190307_S_AT,172823_X_AT,172874_X_AT,172761_X_AT,192280_S_AT,172899_X_AT,172891_X_AT,172702_X_AT,172851_X_AT,172758_X_AT	115	54	7838	7.57295	0.330959	0.0358778	1.46663
GOTERM_BP_FAT	GO:0034622~cellular macromolecular complex assembly	7	2.73438	0.00110959	190436_AT,172685_X_AT,172823_X_AT,192280_S_AT,172758_X_AT,172871_X_AT,190307_S_AT,172761_X_AT,172874_X_AT,172899_X_AT,172851_X_AT,172702_X_AT,172891_X_AT	115	81	7838	5.89007	0.341266	0.0341883	1.52285
GOTERM_BP_FAT	GO:0065003~macromolecular complex assembly	8	3.125	0.00111938	190436_AT,172685_X_AT,172823_X_AT,192280_S_AT,172758_X_AT,172871_X_AT,190307_S_AT,188113_S_AT,172761_X_AT,172874_X_AT,172899_X_AT,172851_X_AT,172702_X_AT,172891_X_AT	115	111	7838	4.91218	0.34369	0.0318749	1.53619
SMART	SM00427:H2B	3	1.17188	0.00116876	172685_X_AT,172874_X_AT,192280_S_AT,172891_X_AT,172702_X_AT,172851_X_AT,172758_X_AT	62	5	5537	53.5839	0.0764425	0.0764425	1.19588
SP_PIR_KEYWORDS	isopeptide bond	4	1.5625	0.00143645	172685_X_AT,172823_X_AT,172874_X_AT,192280_S_AT,172891_X_AT,172702_X_AT,172851_X_AT,172758_X_AT	251	18	19674	17.4183	0.166865	0.0150982	1.65324
INTERPRO	IPR000558:Histone H2B	3	1.17188	0.00176393	172685_X_AT,172874_X_AT,192280_S_AT,172891_X_AT,172702_X_AT,172851_X_AT,172758_X_AT	185	5	13633	44.2151	0.449393	0.09467	2.37347
GOTERM_BP_FAT	GO:0043933~macromolecular complex subunit organization	8	3.125	0.00184777	190436_AT,172685_X_AT,172823_X_AT,192280_S_AT,172758_X_AT,172871_X_AT,190307_S_AT,188113_S_AT,172761_X_AT,172874_X_AT,172899_X_AT,172851_X_AT,172702_X_AT,172891_X_AT	115	121	7838	4.50622	0.501127	0.0484583	2.52403
GOTERM_CC_FAT	GO:0044427~chromosomal part	6	2.34375	0.00214152	172871_X_AT,172685_X_AT,190307_S_AT,172823_X_AT,172874_X_AT,172761_X_AT,192280_S_AT,172899_X_AT,172891_X_AT,172702_X_AT,172851_X_AT,172758_X_AT	95	77	7912	6.48968	0.107405	0.0224682	2.0699
GOTERM_BP_FAT	GO:0034621~cellular macromolecular complex subunit organization	7	2.73438	0.0022639	190436_AT,172685_X_AT,172823_X_AT,192280_S_AT,172758_X_AT,172871_X_AT,190307_S_AT,172761_X_AT,172874_X_AT,172899_X_AT,172851_X_AT,172702_X_AT,172891_X_AT	115	93	7838	5.13006	0.573521	0.0552291	3.08424
SP_PIR_KEYWORDS	ubl conjugation	4	1.5625	0.00379208	172685_X_AT,172823_X_AT,172874_X_AT,192280_S_AT,172891_X_AT,172702_X_AT,172851_X_AT,172758_X_AT	251	25	19674	12.5412	0.382767	0.0364357	4.3104
PIR_SUPERFAMILY	PIRSF002050:histone H2B	3	1.17188	0.00441895	172685_X_AT,172874_X_AT,192280_S_AT,172891_X_AT,172702_X_AT,172851_X_AT,172758_X_AT	99	5	4541	27.5212	0.366288	0.141058	4.82279
GOTERM_CC_FAT	GO:0005694~chromosome	6	2.34375	0.0105149	172871_X_AT,172685_X_AT,190307_S_AT,172823_X_AT,172874_X_AT,172761_X_AT,192280_S_AT,172899_X_AT,172891_X_AT,172702_X_AT,172851_X_AT,172758_X_AT	95	112	7912	4.46165	0.428929	0.0891469	9.79922
SP_PIR_KEYWORDS	acetylation	4	1.5625	0.0106266	190043_S_AT,172871_X_AT,190307_S_AT,AFFX-R2-13514-3_S_AT,172823_X_AT,AFFX-CE_ACTIN_M_S_AT,172761_X_AT,AFFX-R2-13514-5_X_AT,172899_X_AT,AFFX-CE_ACTIN_5_F_AT	251	36	19674	8.70916	0.742518	0.0864834	11.6529
SP_PIR_KEYWORDS	DNA binding	4	1.5625	0.0327761	172871_X_AT,172685_X_AT,190307_S_AT,172823_X_AT,172874_X_AT,172761_X_AT,172899_X_AT	251	55	19674	5.70054	0.985481	0.220388	32.0552
GOTERM_CC_FAT	GO:0043232~intracellular non-membrane-bounded organelle	11	4.29688	0.101786	190436_AT,190043_S_AT,172685_X_AT,172823_X_AT,182844_S_AT,AFFX-CE_ACTIN_M_S_AT,192280_S_AT,172758_X_AT,AFFX-CE_ACTIN_5_F_AT,172871_X_AT,190307_S_AT,AFFX-R2-13514-3_S_AT,181736_S_AT,172761_X_AT,172874_X_AT,174791_S_AT,AFFX-R2-13514-5_X_AT,173448_S_AT,172899_X_AT,172891_X_AT,172702_X_AT,172851_X_AT	95	535	7912	1.71239	0.996618	0.508932	64.9126
GOTERM_CC_FAT	GO:0043228~non-membrane-bounded organelle	11	4.29688	0.101786	190436_AT,190043_S_AT,172685_X_AT,172823_X_AT,182844_S_AT,AFFX-CE_ACTIN_M_S_AT,192280_S_AT,172758_X_AT,AFFX-CE_ACTIN_5_F_AT,172871_X_AT,190307_S_AT,AFFX-R2-13514-3_S_AT,181736_S_AT,172761_X_AT,172874_X_AT,174791_S_AT,AFFX-R2-13514-5_X_AT,173448_S_AT,172899_X_AT,172891_X_AT,172702_X_AT,172851_X_AT	95	535	7912	1.71239	0.996618	0.508932	64.9126
GOTERM_BP_FAT	GO:0006461~protein complex assembly	3	1.17188	0.292588	190436_AT,190307_S_AT,188113_S_AT,172761_X_AT	115	74	7838	2.7631	1	0.933559	99.1642
GOTERM_BP_FAT	GO:0070271~protein complex biogenesis	3	1.17188	0.292588	190436_AT,190307_S_AT,188113_S_AT,172761_X_AT	115	74	7838	2.7631	1	0.933559	99.1642
SP_PIR_KEYWORDS	dna-binding	9	3.51562	0.469506	172685_X_AT,172823_X_AT,192280_S_AT,172758_X_AT,172871_X_AT,190307_S_AT,190863_AT,173008_S_AT,172761_X_AT,172874_X_AT,193857_S_AT,172899_X_AT,172851_X_AT,172702_X_AT,172891_X_AT	251	589	19674	1.19769	1	0.925513	99.9359
SP_PIR_KEYWORDS	nucleus	11	4.29688	0.746823	172685_X_AT,172823_X_AT,182844_S_AT,192280_S_AT,172758_X_AT,188453_AT,172871_X_AT,190307_S_AT,190863_AT,173008_S_AT,172761_X_AT,172874_X_AT,174791_S_AT,172899_X_AT,187818_S_AT,172851_X_AT,172702_X_AT,172891_X_AT	251	928	19674	0.929103	1	0.987239	100
GOTERM_MF_FAT	GO:0003677~DNA binding	13	5.07812	0.787082	187003_AT,172685_X_AT,188971_S_AT,172823_X_AT,192280_S_AT,172758_X_AT,188453_AT,172871_X_AT,190307_S_AT,190863_AT,173008_S_AT,172874_X_AT,172761_X_AT,193857_S_AT,172899_X_AT,172891_X_AT,172702_X_AT,172851_X_AT,187818_S_AT	108	895	6686	0.899214	1	0.999595	100
				0.0797778					12.001
Annotation Cluster 5	Enrichment Score: 2.455952989631356
Category	Term	Count	%	PValue	Genes	List Total	Pop Hits	Pop Total	Fold Enrichment	Bonferroni	Benjamini	FDR
GOTERM_CC_FAT	GO:0005576~extracellular region	15	5.85938	1.59165e-05	192737_AT,180297_AT,192404_AT,172427_X_AT,190353_S_AT,193561_AT,172375_X_AT,190101_S_AT,177065_AT,179334_S_AT,173466_S_AT,193133_S_AT,191691_AT,190057_S_AT,174371_AT,187525_S_AT	95	311	7912	4.01692	0.000843224	0.000843224	0.0155278
SP_PIR_KEYWORDS	Secreted	10	3.90625	0.000319353	190057_S_AT,172427_X_AT,172375_X_AT,193561_AT,190353_S_AT,174371_AT,190101_S_AT,177065_AT,179334_S_AT,173466_S_AT,191691_AT	251	169	19674	4.63802	0.0397526	0.00673791	0.369729
SP_PIR_KEYWORDS	signal	15	5.85938	0.00111103	172427_X_AT,192747_AT,190353_S_AT,193561_AT,172375_X_AT,173348_S_AT,190101_S_AT,177065_AT,173466_S_AT,179334_S_AT,191691_AT,190057_S_AT,175642_S_AT,174371_AT,187525_S_AT,187582_AT	251	424	19674	2.77296	0.131666	0.0127524	1.28091
UP_SEQ_FEATURE	signal peptide	15	5.85938	0.0102307	172427_X_AT,192747_AT,190353_S_AT,193561_AT,172375_X_AT,173348_S_AT,190101_S_AT,177065_AT,173466_S_AT,179334_S_AT,191691_AT,190057_S_AT,175642_S_AT,174371_AT,187525_S_AT,187582_AT	57	422	3249	2.02607	0.863984	0.631197	12.0366
SP_PIR_KEYWORDS	glycoprotein	11	4.29688	0.0517193	190168_AT,187493_AT,190057_S_AT,192747_AT,190353_S_AT,174371_AT,173348_S_AT,187525_S_AT,190101_S_AT,177065_AT,179334_S_AT,193007_S_AT	251	435	19674	1.98209	0.998822	0.312493	45.9823
UP_SEQ_FEATURE	glycosylation site:N-linked (GlcNAc...)	8	3.125	0.615007	187493_AT,190057_S_AT,192747_AT,174371_AT,187525_S_AT,190101_S_AT,177065_AT,179334_S_AT,193007_S_AT	57	426	3249	1.07042	1	1	99.9993
				0.113067					2.75108
Annotation Cluster 6	Enrichment Score: 2.3322171491307184
Category	Term	Count	%	PValue	Genes	List Total	Pop Hits	Pop Total	Fold Enrichment	Bonferroni	Benjamini	FDR
SP_PIR_KEYWORDS	amidation	5	1.95312	0.0001285	172427_X_AT,172375_X_AT,193561_AT,173466_S_AT,187582_AT	251	21	19674	18.6625	0.0161881	0.00542542	0.148921
SP_PIR_KEYWORDS	Secreted	10	3.90625	0.000319353	190057_S_AT,172427_X_AT,172375_X_AT,193561_AT,190353_S_AT,174371_AT,190101_S_AT,177065_AT,179334_S_AT,173466_S_AT,191691_AT	251	169	19674	4.63802	0.0397526	0.00673791	0.369729
SP_PIR_KEYWORDS	cleavage on pair of basic residues	5	1.95312	0.000470831	172427_X_AT,172375_X_AT,193561_AT,173466_S_AT,187582_AT	251	29	19674	13.5142	0.0580561	0.00850783	0.544665
SP_PIR_KEYWORDS	neuropeptide	5	1.95312	0.00108919	172427_X_AT,172375_X_AT,193561_AT,173466_S_AT,187582_AT	251	36	19674	10.8865	0.129252	0.0137449	1.25587
GOTERM_BP_FAT	GO:0007218~neuropeptide signaling pathway	5	1.95312	0.00671796	172427_X_AT,172375_X_AT,193561_AT,173466_S_AT,187582_AT	115	52	7838	6.55351	0.920697	0.131341	8.8963
GOTERM_BP_FAT	GO:0007186~G-protein coupled receptor protein signaling pathway	6	2.34375	0.489108	172427_X_AT,172375_X_AT,193561_AT,183974_AT,173466_S_AT,187582_AT	115	316	7838	1.29411	1	0.985134	99.9907
GOTERM_BP_FAT	GO:0007166~cell surface receptor linked signal transduction	6	2.34375	0.683432	172427_X_AT,172375_X_AT,193561_AT,183974_AT,173466_S_AT,187582_AT	115	393	7838	1.04056	1	0.998271	100
				0.168752					8.08419
Annotation Cluster 7	Enrichment Score: 1.8054536777998977
Category	Term	Count	%	PValue	Genes	List Total	Pop Hits	Pop Total	Fold Enrichment	Bonferroni	Benjamini	FDR
KEGG_PATHWAY	cel00250:Alanine, aspartate and glutamate metabolism	7	2.73438	1.25797e-05	190626_S_AT,192101_AT,191683_AT,191910_AT,190646_S_AT,190094_S_AT,186734_S_AT	35	26	1534	11.8	0.000591076	0.000591076	0.0119478
GOTERM_BP_FAT	GO:0044271~nitrogen compound biosynthetic process	7	2.73438	0.109321	192101_AT,191910_AT,188971_S_AT,190094_S_AT,188137_S_AT,186734_S_AT,188289_S_AT	115	225	7838	2.12043	1	0.681942	79.815
GOTERM_MF_FAT	GO:0016879~ligase activity, forming carbon-nitrogen bonds	4	1.5625	0.170286	192101_AT,190094_S_AT,186734_S_AT,187806_S_AT	108	89	6686	2.78236	1	0.919046	90.4016
SP_PIR_KEYWORDS	ligase	3	1.17188	0.256232	192101_AT,190094_S_AT,186734_S_AT	251	77	19674	3.05386	1	0.738858	96.7711
				0.133963					4.93916
Annotation Cluster 8	Enrichment Score: 1.7217782831554633
Category	Term	Count	%	PValue	Genes	List Total	Pop Hits	Pop Total	Fold Enrichment	Bonferroni	Benjamini	FDR
GOTERM_BP_FAT	GO:0009408~response to heat	4	1.5625	0.00753349	189570_AT,172744_AT,192323_AT,192338_AT	115	28	7838	9.73665	0.941768	0.132523	9.92479
INTERPRO	IPR001436:Alpha crystallin/Heat shock protein	3	1.17188	0.0169494	189570_AT,192323_AT,192338_AT	185	15	13633	14.7384	0.996905	0.561953	20.752
INTERPRO	IPR002068:Heat shock protein Hsp20	3	1.17188	0.0192008	189570_AT,192323_AT,192338_AT	185	16	13633	13.8172	0.998574	0.559181	23.186
GOTERM_BP_FAT	GO:0009266~response to temperature stimulus	4	1.5625	0.025764	189570_AT,172744_AT,192323_AT,192338_AT	115	44	7838	6.19605	0.999945	0.335637	30.2874
GOTERM_BP_FAT	GO:0009628~response to abiotic stimulus	5	1.95312	0.0389607	189570_AT,187084_AT,172744_AT,192323_AT,192338_AT	115	88	7838	3.87253	1	0.425018	42.2648
				0.0216817					9.67217
Annotation Cluster 9	Enrichment Score: 1.4876728072063337
Category	Term	Count	%	PValue	Genes	List Total	Pop Hits	Pop Total	Fold Enrichment	Bonferroni	Benjamini	FDR
SP_PIR_KEYWORDS	metalloprotein	8	3.125	0.000210115	185599_S_AT,190168_AT,172935_X_AT,189575_AT,172790_X_AT,189578_AT,192617_AT,192664_S_AT,189457_AT	251	95	19674	6.60063	0.0263344	0.00532325	0.2434
GOTERM_MF_FAT	GO:0005506~iron ion binding	13	5.07812	0.000914301	185599_S_AT,172935_X_AT,187997_S_AT,189575_AT,187910_AT,192357_AT,188378_S_AT,193726_AT,190427_S_AT,172790_X_AT,189578_AT,172933_X_AT,189457_AT,192664_S_AT	108	262	6686	3.07174	0.168707	0.0882475	1.14181
SP_PIR_KEYWORDS	iron	10	3.90625	0.00103706	188378_S_AT,185599_S_AT,172935_X_AT,189575_AT,187997_S_AT,172790_X_AT,189578_AT,172933_X_AT,192357_AT,192664_S_AT,189457_AT	251	199	19674	3.93882	0.123461	0.0145349	1.19609
SP_PIR_KEYWORDS	Monooxygenase	5	1.95312	0.0258792	185599_S_AT,189575_AT,172790_X_AT,191759_AT,189578_AT,189457_AT	251	88	19674	4.45355	0.964205	0.187891	26.2194
PIR_SUPERFAMILY	PIRSF000051:cytochrome P450 CYP3A5	3	1.17188	0.0264315	185599_S_AT,189575_AT,172790_X_AT,189578_AT	99	12	4541	11.4672	0.936649	0.498307	25.8421
UP_SEQ_FEATURE	metal ion-binding site:Iron (heme axial ligand)	3	1.17188	0.0454646	185599_S_AT,189575_AT,172790_X_AT,189578_AT	57	20	3249	8.55	0.99988	0.950658	44.0271
INTERPRO	IPR017973:Cytochrome P450, C-terminal region	4	1.5625	0.0783106	185599_S_AT,189575_AT,172790_X_AT,189578_AT,189457_AT	185	74	13633	3.98335	1	0.936473	67.0281
INTERPRO	IPR002401:Cytochrome P450, E-class, group I	4	1.5625	0.0807998	185599_S_AT,189575_AT,172790_X_AT,189578_AT,189457_AT	185	75	13633	3.93023	1	0.924891	68.2193
INTERPRO	IPR017972:Cytochrome P450, conserved site	4	1.5625	0.0807998	185599_S_AT,189575_AT,172790_X_AT,189578_AT,189457_AT	185	75	13633	3.93023	1	0.924891	68.2193
GOTERM_MF_FAT	GO:0020037~heme binding	6	2.34375	0.0823595	193726_AT,185599_S_AT,189575_AT,172790_X_AT,189578_AT,187910_AT,189457_AT	108	145	6686	2.56169	1	0.885848	66.008
INTERPRO	IPR001128:Cytochrome P450	4	1.5625	0.0858799	185599_S_AT,189575_AT,172790_X_AT,189578_AT,189457_AT	185	77	13633	3.82815	1	0.920276	70.5275
GOTERM_MF_FAT	GO:0046906~tetrapyrrole binding	6	2.34375	0.0861542	193726_AT,185599_S_AT,189575_AT,172790_X_AT,189578_AT,187910_AT,189457_AT	108	147	6686	2.52683	1	0.867622	67.7311
KEGG_PATHWAY	cel00903:Limonene and pinene degradation	3	1.17188	0.0971502	185599_S_AT,189575_AT,172790_X_AT,189578_AT	35	24	1534	5.47857	0.991798	0.617364	62.1185
COG_ONTOLOGY	Secondary metabolites biosynthesis, transport, and catabolism	4	1.5625	0.171691	185599_S_AT,189575_AT,172790_X_AT,189578_AT,189457_AT	21	81	1118	2.62904	0.874074	0.874074	69.0699
SP_PIR_KEYWORDS	heme	4	1.5625	0.209316	185599_S_AT,189575_AT,172790_X_AT,189578_AT,189457_AT	251	124	19674	2.52847	1	0.696712	93.4365
GOTERM_MF_FAT	GO:0009055~electron carrier activity	6	2.34375	0.233681	185599_S_AT,189575_AT,172790_X_AT,193024_AT,189578_AT,189584_S_AT,189457_AT	108	206	6686	1.80313	1	0.940968	96.4614
				0.0531839					4.94777
Annotation Cluster 10	Enrichment Score: 1.1949581063779688
Category	Term	Count	%	PValue	Genes	List Total	Pop Hits	Pop Total	Fold Enrichment	Bonferroni	Benjamini	FDR
GOTERM_BP_FAT	GO:0040010~positive regulation of growth rate	34	13.2812	0.0482437	190626_S_AT,179523_AT,172685_X_AT,189575_AT,187493_AT,182844_S_AT,190353_S_AT,192910_S_AT,188137_S_AT,187910_AT,172758_X_AT,190958_S_AT,172193_AT,172871_X_AT,190307_S_AT,187996_S_AT,188113_S_AT,190863_AT,172874_X_AT,174791_S_AT,172899_X_AT,187818_S_AT,192101_AT,187997_S_AT,177903_S_AT,190671_AT,173626_S_AT,172823_X_AT,183157_S_AT,191831_S_AT,188378_S_AT,192822_S_AT,188453_AT,192079_S_AT,171941_S_…	115	1723	7838	1.34493	1	0.473286	49.5136
GOTERM_BP_FAT	GO:0040009~regulation of growth rate	34	13.2812	0.0485887	190626_S_AT,179523_AT,172685_X_AT,189575_AT,187493_AT,182844_S_AT,190353_S_AT,192910_S_AT,188137_S_AT,187910_AT,172758_X_AT,190958_S_AT,172193_AT,172871_X_AT,190307_S_AT,187996_S_AT,188113_S_AT,190863_AT,172874_X_AT,174791_S_AT,172899_X_AT,187818_S_AT,192101_AT,187997_S_AT,177903_S_AT,190671_AT,173626_S_AT,172823_X_AT,183157_S_AT,191831_S_AT,188378_S_AT,192822_S_AT,188453_AT,192079_S_AT,171941_S_…	115	1724	7838	1.34415	1	0.464348	49.766
GOTERM_BP_FAT	GO:0045927~positive regulation of growth	36	14.0625	0.0696882	190626_S_AT,179523_AT,172685_X_AT,189575_AT,187493_AT,182844_S_AT,190353_S_AT,192910_S_AT,188137_S_AT,187910_AT,172758_X_AT,188289_S_AT,190958_S_AT,172193_AT,172871_X_AT,190307_S_AT,187996_S_AT,188113_S_AT,190863_AT,191000_S_AT,172874_X_AT,174791_S_AT,172899_X_AT,187818_S_AT,192101_AT,187997_S_AT,177903_S_AT,190671_AT,173626_S_AT,172823_X_AT,183157_S_AT,191831_S_AT,188378_S_AT,192822_S_AT,188453_…	115	1904	7838	1.28867	1	0.550149	63.1557
GOTERM_BP_FAT	GO:0040008~regulation of growth	36	14.0625	0.101632	190626_S_AT,179523_AT,172685_X_AT,189575_AT,187493_AT,182844_S_AT,190353_S_AT,192910_S_AT,188137_S_AT,187910_AT,172758_X_AT,188289_S_AT,190958_S_AT,172193_AT,172871_X_AT,190307_S_AT,187996_S_AT,188113_S_AT,190863_AT,191000_S_AT,172874_X_AT,174791_S_AT,172899_X_AT,187818_S_AT,192101_AT,187997_S_AT,177903_S_AT,190671_AT,173626_S_AT,172823_X_AT,183157_S_AT,191831_S_AT,188378_S_AT,192822_S_AT,188453_…	115	1967	7838	1.2474	1	0.663494	77.2687
				0.0555069					1.30629
Annotation Cluster 11	Enrichment Score: 1.155972694365924
Category	Term	Count	%	PValue	Genes	List Total	Pop Hits	Pop Total	Fold Enrichment	Bonferroni	Benjamini	FDR
GOTERM_BP_FAT	GO:0030005~cellular di-, tri-valent inorganic cation homeostasis	3	1.17188	0.00419859	188378_S_AT,188971_S_AT,190427_S_AT	115	7	7838	29.2099	0.794435	0.0941437	5.6498
GOTERM_BP_FAT	GO:0055066~di-, tri-valent inorganic cation homeostasis	3	1.17188	0.0070619	188378_S_AT,188971_S_AT,190427_S_AT	115	9	7838	22.7188	0.930379	0.130857	9.33138
GOTERM_BP_FAT	GO:0030003~cellular cation homeostasis	3	1.17188	0.0105861	188378_S_AT,188971_S_AT,190427_S_AT	115	11	7838	18.5881	0.981713	0.173497	13.6797
GOTERM_BP_FAT	GO:0006873~cellular ion homeostasis	3	1.17188	0.0247336	188378_S_AT,188971_S_AT,190427_S_AT	115	17	7838	12.0276	0.999919	0.335968	29.2612
GOTERM_BP_FAT	GO:0055082~cellular chemical homeostasis	3	1.17188	0.0275646	188378_S_AT,188971_S_AT,190427_S_AT	115	18	7838	11.3594	0.999973	0.343211	32.0474
GOTERM_BP_FAT	GO:0055080~cation homeostasis	3	1.17188	0.040084	188378_S_AT,188971_S_AT,190427_S_AT	115	22	7838	9.29407	1	0.422678	43.1905
GOTERM_BP_FAT	GO:0050801~ion homeostasis	3	1.17188	0.0620216	188378_S_AT,188971_S_AT,190427_S_AT	115	28	7838	7.30248	1	0.528734	58.7297
GOTERM_BP_FAT	GO:0015674~di-, tri-valent inorganic cation transport	3	1.17188	0.0700612	188378_S_AT,188971_S_AT,190427_S_AT	115	30	7838	6.81565	1	0.541742	63.3593
GOTERM_BP_FAT	GO:0048878~chemical homeostasis	3	1.17188	0.0915026	188378_S_AT,188971_S_AT,190427_S_AT	115	35	7838	5.84199	1	0.632959	73.4581
GOTERM_BP_FAT	GO:0019725~cellular homeostasis	4	1.5625	0.146232	188378_S_AT,188971_S_AT,190427_S_AT,191000_S_AT	115	91	7838	2.99589	1	0.765396	88.7553
GOTERM_BP_FAT	GO:0042592~homeostatic process	4	1.5625	0.238127	188378_S_AT,188971_S_AT,190427_S_AT,191000_S_AT	115	116	7838	2.35022	1	0.902134	97.6701
GOTERM_BP_FAT	GO:0006812~cation transport	5	1.95312	0.69286	188378_S_AT,188971_S_AT,190427_S_AT,193024_AT,188137_S_AT	115	321	7838	1.06163	1	0.998392	100
GOTERM_BP_FAT	GO:0030001~metal ion transport	3	1.17188	0.857951	188378_S_AT,188971_S_AT,190427_S_AT	115	233	7838	0.877552	1	0.999803	100
GOTERM_BP_FAT	GO:0006811~ion transport	5	1.95312	0.928108	188378_S_AT,188971_S_AT,190427_S_AT,193024_AT,188137_S_AT	115	484	7838	0.704096	1	0.999973	100
Annotation Cluster 12	Enrichment Score: 0.7702503236574856
Category	Term	Count	%	PValue	Genes	List Total	Pop Hits	Pop Total	Fold Enrichment	Bonferroni	Benjamini	FDR
INTERPRO	IPR004046:Glutathione S-transferase, C-terminal	3	1.17188	0.146121	187084_AT,190962_S_AT,190957_AT	185	50	13633	4.42151	1	0.964457	88.3429
INTERPRO	IPR017933:Glutathione S-transferase/chloride channel, C-terminal	3	1.17188	0.155517	187084_AT,190962_S_AT,190957_AT	185	52	13633	4.25146	1	0.958165	89.9721
INTERPRO	IPR004045:Glutathione S-transferase, N-terminal	3	1.17188	0.155517	187084_AT,190962_S_AT,190957_AT	185	52	13633	4.25146	1	0.958165	89.9721
INTERPRO	IPR012335:Thioredoxin fold	4	1.5625	0.234818	191000_S_AT,187084_AT,190962_S_AT,190957_AT	185	124	13633	2.37716	1	0.986536	97.3787
Annotation Cluster 13	Enrichment Score: 0.7487710405690796
Category	Term	Count	%	PValue	Genes	List Total	Pop Hits	Pop Total	Fold Enrichment	Bonferroni	Benjamini	FDR
GOTERM_MF_FAT	GO:0043169~cation binding	39	15.2344	0.0960884	185599_S_AT,191832_AT,189575_AT,193926_AT,192747_AT,190244_S_AT,178236_S_AT,187910_AT,188289_S_AT,192357_AT,193726_AT,190978_AT,172790_X_AT,184845_AT,173448_S_AT,187818_S_AT,189457_AT,192101_AT,190168_AT,172935_X_AT,187997_S_AT,192617_AT,190101_S_AT,191831_S_AT,188378_S_AT,192822_S_AT,188453_AT,192079_S_AT,180453_AT,192958_AT,190057_S_AT,192333_AT,190427_S_AT,173008_S_AT,172933_X_AT,189578_AT,174…	108	1960	6686	1.23183	1	0.870059	71.8688
GOTERM_MF_FAT	GO:0043167~ion binding	39	15.2344	0.0997112	185599_S_AT,191832_AT,189575_AT,193926_AT,192747_AT,190244_S_AT,178236_S_AT,187910_AT,188289_S_AT,192357_AT,193726_AT,190978_AT,172790_X_AT,184845_AT,173448_S_AT,187818_S_AT,189457_AT,192101_AT,190168_AT,172935_X_AT,187997_S_AT,192617_AT,190101_S_AT,191831_S_AT,188378_S_AT,192822_S_AT,188453_AT,192079_S_AT,180453_AT,192958_AT,190057_S_AT,192333_AT,190427_S_AT,173008_S_AT,172933_X_AT,189578_AT,174…	108	1966	6686	1.22807	1	0.854693	73.2519
GOTERM_MF_FAT	GO:0046914~transition metal ion binding	32	12.5	0.1078	185599_S_AT,191832_AT,189575_AT,193926_AT,190244_S_AT,187910_AT,192357_AT,193726_AT,190978_AT,172790_X_AT,184845_AT,187818_S_AT,189457_AT,190168_AT,172935_X_AT,187997_S_AT,192617_AT,190101_S_AT,188378_S_AT,192822_S_AT,188453_AT,192079_S_AT,180453_AT,192958_AT,190057_S_AT,192333_AT,190427_S_AT,173008_S_AT,172933_X_AT,189578_AT,174371_AT,172744_AT,190566_AT,192664_S_AT	108	1567	6686	1.26422	1	0.853408	76.1174
SP_PIR_KEYWORDS	metal-binding	18	7.03125	0.166732	192101_AT,190168_AT,185599_S_AT,189575_AT,192617_AT,190101_S_AT,191831_S_AT,188378_S_AT,192822_S_AT,188453_AT,192079_S_AT,190978_AT,192958_AT,172790_X_AT,173008_S_AT,174371_AT,189578_AT,172744_AT,187818_S_AT,189457_AT	251	1033	19674	1.36581	1	0.65109	87.9403
GOTERM_MF_FAT	GO:0046872~metal ion binding	36	14.0625	0.196906	185599_S_AT,191832_AT,189575_AT,193926_AT,190244_S_AT,187910_AT,188289_S_AT,192357_AT,193726_AT,190978_AT,172790_X_AT,184845_AT,173448_S_AT,187818_S_AT,189457_AT,192101_AT,190168_AT,172935_X_AT,187997_S_AT,192617_AT,190101_S_AT,191831_S_AT,188378_S_AT,192822_S_AT,188453_AT,192079_S_AT,180453_AT,192958_AT,190057_S_AT,192333_AT,190427_S_AT,173008_S_AT,172933_X_AT,189578_AT,174371_AT,172744_AT,19056…	108	1910	6686	1.16684	1	0.926142	93.6262
GOTERM_MF_FAT	GO:0008270~zinc ion binding	15	5.85938	0.948553	191832_AT,190168_AT,193926_AT,190244_S_AT,190101_S_AT,188453_AT,190978_AT,180453_AT,192079_S_AT,192958_AT,190057_S_AT,192333_AT,173008_S_AT,174371_AT,190566_AT,187818_S_AT	108	1238	6686	0.75009	1	0.999999	100
Annotation Cluster 14	Enrichment Score: 0.7244381902285016
Category	Term	Count	%	PValue	Genes	List Total	Pop Hits	Pop Total	Fold Enrichment	Bonferroni	Benjamini	FDR
GOTERM_MF_FAT	GO:0042626~ATPase activity, coupled to transmembrane movement of substances	5	1.95312	0.0373153	188971_S_AT,189402_S_AT,188137_S_AT,188289_S_AT,193007_S_AT	108	79	6686	3.91819	0.999539	0.853463	37.9627
GOTERM_MF_FAT	GO:0043492~ATPase activity, coupled to movement of substances	5	1.95312	0.0373153	188971_S_AT,189402_S_AT,188137_S_AT,188289_S_AT,193007_S_AT	108	79	6686	3.91819	0.999539	0.853463	37.9627
GOTERM_MF_FAT	GO:0015399~primary active transmembrane transporter activity	5	1.95312	0.0468045	188971_S_AT,189402_S_AT,188137_S_AT,188289_S_AT,193007_S_AT	108	85	6686	3.64161	0.999938	0.855804	45.2174
GOTERM_MF_FAT	GO:0015405~P-P-bond-hydrolysis-driven transmembrane transporter activity	5	1.95312	0.0468045	188971_S_AT,189402_S_AT,188137_S_AT,188289_S_AT,193007_S_AT	108	85	6686	3.64161	0.999938	0.855804	45.2174
GOTERM_MF_FAT	GO:0016820~hydrolase activity, acting on acid anhydrides, catalyzing transmembrane movement of substances	5	1.95312	0.0538109	188971_S_AT,189402_S_AT,188137_S_AT,188289_S_AT,193007_S_AT	108	89	6686	3.47794	0.999986	0.84467	50.0636
GOTERM_BP_FAT	GO:0044271~nitrogen compound biosynthetic process	7	2.73438	0.109321	192101_AT,191910_AT,188971_S_AT,190094_S_AT,188137_S_AT,186734_S_AT,188289_S_AT	115	225	7838	2.12043	1	0.681942	79.815
GOTERM_MF_FAT	GO:0042623~ATPase activity, coupled	6	2.34375	0.113	188453_AT,188971_S_AT,189402_S_AT,188137_S_AT,188289_S_AT,193007_S_AT	108	160	6686	2.32153	1	0.844828	77.8071
GOTERM_MF_FAT	GO:0042625~ATPase activity, coupled to transmembrane movement of ions	3	1.17188	0.139375	188971_S_AT,188137_S_AT,188289_S_AT	108	41	6686	4.52981	1	0.885327	84.8074
GOTERM_BP_FAT	GO:0034404~nucleobase, nucleoside and nucleotide biosynthetic process	5	1.95312	0.182951	192101_AT,191910_AT,188971_S_AT,188137_S_AT,188289_S_AT	115	153	7838	2.22734	1	0.836163	93.8757
GOTERM_BP_FAT	GO:0034654~nucleobase, nucleoside, nucleotide and nucleic acid biosynthetic process	5	1.95312	0.182951	192101_AT,191910_AT,188971_S_AT,188137_S_AT,188289_S_AT	115	153	7838	2.22734	1	0.836163	93.8757
GOTERM_BP_FAT	GO:0006164~purine nucleotide biosynthetic process	4	1.5625	0.234254	192101_AT,188971_S_AT,188137_S_AT,188289_S_AT	115	115	7838	2.37066	1	0.90308	97.501
GOTERM_MF_FAT	GO:0016887~ATPase activity	6	2.34375	0.245619	188453_AT,188971_S_AT,189402_S_AT,188137_S_AT,188289_S_AT,193007_S_AT	108	210	6686	1.76878	1	0.941968	97.0945
GOTERM_BP_FAT	GO:0006163~purine nucleotide metabolic process	4	1.5625	0.24981	192101_AT,188971_S_AT,188137_S_AT,188289_S_AT	115	119	7838	2.29098	1	0.90943	98.1182
GOTERM_BP_FAT	GO:0006754~ATP biosynthetic process	3	1.17188	0.270952	188971_S_AT,188137_S_AT,188289_S_AT	115	70	7838	2.92099	1	0.924459	98.7325
GOTERM_BP_FAT	GO:0046034~ATP metabolic process	3	1.17188	0.281776	188971_S_AT,188137_S_AT,188289_S_AT	115	72	7838	2.83986	1	0.929192	98.9692
GOTERM_BP_FAT	GO:0009145~purine nucleoside triphosphate biosynthetic process	3	1.17188	0.297987	188971_S_AT,188137_S_AT,188289_S_AT	115	75	7838	2.72626	1	0.933788	99.2482
GOTERM_BP_FAT	GO:0009142~nucleoside triphosphate biosynthetic process	3	1.17188	0.297987	188971_S_AT,188137_S_AT,188289_S_AT	115	75	7838	2.72626	1	0.933788	99.2482
GOTERM_BP_FAT	GO:0009206~purine ribonucleoside triphosphate biosynthetic process	3	1.17188	0.297987	188971_S_AT,188137_S_AT,188289_S_AT	115	75	7838	2.72626	1	0.933788	99.2482
GOTERM_BP_FAT	GO:0009201~ribonucleoside triphosphate biosynthetic process	3	1.17188	0.297987	188971_S_AT,188137_S_AT,188289_S_AT	115	75	7838	2.72626	1	0.933788	99.2482
GOTERM_BP_FAT	GO:0009144~purine nucleoside triphosphate metabolic process	3	1.17188	0.308767	188971_S_AT,188137_S_AT,188289_S_AT	115	77	7838	2.65545	1	0.937773	99.3929
GOTERM_BP_FAT	GO:0009199~ribonucleoside triphosphate metabolic process	3	1.17188	0.308767	188971_S_AT,188137_S_AT,188289_S_AT	115	77	7838	2.65545	1	0.937773	99.3929
GOTERM_BP_FAT	GO:0009205~purine ribonucleoside triphosphate metabolic process	3	1.17188	0.308767	188971_S_AT,188137_S_AT,188289_S_AT	115	77	7838	2.65545	1	0.937773	99.3929
GOTERM_BP_FAT	GO:0009141~nucleoside triphosphate metabolic process	3	1.17188	0.314145	188971_S_AT,188137_S_AT,188289_S_AT	115	78	7838	2.6214	1	0.937968	99.4551
GOTERM_BP_FAT	GO:0009152~purine ribonucleotide biosynthetic process	3	1.17188	0.356785	188971_S_AT,188137_S_AT,188289_S_AT	115	86	7838	2.37755	1	0.956307	99.7756
GOTERM_BP_FAT	GO:0009165~nucleotide biosynthetic process	4	1.5625	0.357223	192101_AT,188971_S_AT,188137_S_AT,188289_S_AT	115	146	7838	1.8673	1	0.953918	99.7777
GOTERM_BP_FAT	GO:0009150~purine ribonucleotide metabolic process	3	1.17188	0.372547	188971_S_AT,188137_S_AT,188289_S_AT	115	89	7838	2.29741	1	0.958677	99.8407
GOTERM_BP_FAT	GO:0009260~ribonucleotide biosynthetic process	3	1.17188	0.372547	188971_S_AT,188137_S_AT,188289_S_AT	115	89	7838	2.29741	1	0.958677	99.8407
GOTERM_BP_FAT	GO:0009259~ribonucleotide metabolic process	3	1.17188	0.388155	188971_S_AT,188137_S_AT,188289_S_AT	115	92	7838	2.2225	1	0.963064	99.8876
Annotation Cluster 15	Enrichment Score: 0.6718508596785914
Category	Term	Count	%	PValue	Genes	List Total	Pop Hits	Pop Total	Fold Enrichment	Bonferroni	Benjamini	FDR
GOTERM_CC_FAT	GO:0043232~intracellular non-membrane-bounded organelle	11	4.29688	0.101786	190436_AT,190043_S_AT,172685_X_AT,172823_X_AT,182844_S_AT,AFFX-CE_ACTIN_M_S_AT,192280_S_AT,172758_X_AT,AFFX-CE_ACTIN_5_F_AT,172871_X_AT,190307_S_AT,AFFX-R2-13514-3_S_AT,181736_S_AT,172761_X_AT,172874_X_AT,174791_S_AT,AFFX-R2-13514-5_X_AT,173448_S_AT,172899_X_AT,172891_X_AT,172702_X_AT,172851_X_AT	95	535	7912	1.71239	0.996618	0.508932	64.9126
GOTERM_CC_FAT	GO:0043228~non-membrane-bounded organelle	11	4.29688	0.101786	190436_AT,190043_S_AT,172685_X_AT,172823_X_AT,182844_S_AT,AFFX-CE_ACTIN_M_S_AT,192280_S_AT,172758_X_AT,AFFX-CE_ACTIN_5_F_AT,172871_X_AT,190307_S_AT,AFFX-R2-13514-3_S_AT,181736_S_AT,172761_X_AT,172874_X_AT,174791_S_AT,AFFX-R2-13514-5_X_AT,173448_S_AT,172899_X_AT,172891_X_AT,172702_X_AT,172851_X_AT	95	535	7912	1.71239	0.996618	0.508932	64.9126
SP_PIR_KEYWORDS	cytoskeleton	4	1.5625	0.21261	190043_S_AT,AFFX-R2-13514-3_S_AT,181736_S_AT,182844_S_AT,AFFX-CE_ACTIN_M_S_AT,174791_S_AT,AFFX-R2-13514-5_X_AT,173448_S_AT,AFFX-CE_ACTIN_5_F_AT	251	125	19674	2.50824	1	0.68888	93.7467
GOTERM_CC_FAT	GO:0005856~cytoskeleton	5	1.95312	0.30523	190043_S_AT,190436_AT,AFFX-R2-13514-3_S_AT,181736_S_AT,182844_S_AT,AFFX-CE_ACTIN_M_S_AT,174791_S_AT,AFFX-R2-13514-5_X_AT,173448_S_AT,AFFX-CE_ACTIN_5_F_AT	95	235	7912	1.772	1	0.882883	97.1363
SP_PIR_KEYWORDS	cytoplasm	5	1.95312	0.650371	192101_AT,190043_S_AT,AFFX-R2-13514-3_S_AT,182844_S_AT,AFFX-CE_ACTIN_M_S_AT,172697_X_AT,174791_S_AT,AFFX-R2-13514-5_X_AT,173448_S_AT,AFFX-CE_ACTIN_5_F_AT	251	349	19674	1.12296	1	0.972869	99.9995
Annotation Cluster 16	Enrichment Score: 0.6189109056712725
Category	Term	Count	%	PValue	Genes	List Total	Pop Hits	Pop Total	Fold Enrichment	Bonferroni	Benjamini	FDR
SMART	SM00156:PP2Ac	3	1.17188	0.101039	172935_X_AT,172933_X_AT,192664_S_AT	62	49	5537	5.46774	0.999285	0.836471	66.573
INTERPRO	IPR006186:Serine/threonine-specific protein phosphatase and bis(5-nucleosyl)-tetraphosphatase	3	1.17188	0.141469	172935_X_AT,172933_X_AT,192664_S_AT	185	49	13633	4.51175	1	0.967841	87.4486
INTERPRO	IPR004843:Metallophosphoesterase	3	1.17188	0.218785	172935_X_AT,172933_X_AT,192664_S_AT	185	65	13633	3.40116	1	0.984589	96.5242
GOTERM_MF_FAT	GO:0016791~phosphatase activity	5	1.95312	0.488128	191521_S_AT,172935_X_AT,172933_X_AT,176230_AT,192664_S_AT	108	225	6686	1.37572	1	0.98129	99.9777
GOTERM_MF_FAT	GO:0004721~phosphoprotein phosphatase activity	4	1.5625	0.526919	191521_S_AT,172935_X_AT,172933_X_AT,192664_S_AT	108	173	6686	1.43139	1	0.986698	99.9917
Annotation Cluster 17	Enrichment Score: 0.5462748642617192
Category	Term	Count	%	PValue	Genes	List Total	Pop Hits	Pop Total	Fold Enrichment	Bonferroni	Benjamini	FDR
SP_PIR_KEYWORDS	glycoprotein	11	4.29688	0.0517193	190168_AT,187493_AT,190057_S_AT,192747_AT,190353_S_AT,174371_AT,173348_S_AT,187525_S_AT,190101_S_AT,177065_AT,179334_S_AT,193007_S_AT	251	435	19674	1.98209	0.998822	0.312493	45.9823
SP_PIR_KEYWORDS	disulfide bond	4	1.5625	0.610231	190057_S_AT,190353_S_AT,174371_AT,187525_S_AT,190101_S_AT	251	247	19674	1.26935	1	0.973379	99.9982
UP_SEQ_FEATURE	disulfide bond	4	1.5625	0.727828	190057_S_AT,190353_S_AT,174371_AT,187525_S_AT,190101_S_AT	57	215	3249	1.06047	1	1	100
Annotation Cluster 18	Enrichment Score: 0.4345441261917027
Category	Term	Count	%	PValue	Genes	List Total	Pop Hits	Pop Total	Fold Enrichment	Bonferroni	Benjamini	FDR
SP_PIR_KEYWORDS	atp-binding	12	4.6875	0.205045	190043_S_AT,188971_S_AT,AFFX-CE_ACTIN_M_S_AT,191006_S_AT,188289_S_AT,AFFX-CE_ACTIN_5_F_AT,190958_S_AT,193007_S_AT,189054_AT,188453_AT,192822_S_AT,189818_AT,AFFX-R2-13514-3_S_AT,171941_S_AT,189402_S_AT,AFFX-R2-13514-5_X_AT,193857_S_AT	251	649	19674	1.44929	1	0.703075	93.0134
GOTERM_MF_FAT	GO:0032559~adenyl ribonucleotide binding	18	7.03125	0.338345	191641_S_AT,190043_S_AT,187003_AT,188971_S_AT,190671_AT,191006_S_AT,AFFX-CE_ACTIN_M_S_AT,185480_S_AT,190859_S_AT,188289_S_AT,190958_S_AT,AFFX-CE_ACTIN_5_F_AT,193007_S_AT,192822_S_AT,188453_AT,189054_AT,189818_AT,AFFX-R2-13514-3_S_AT,171941_S_AT,189402_S_AT,AFFX-R2-13514-5_X_AT,193857_S_AT,187806_S_AT	108	944	6686	1.18044	1	0.969075	99.4401
GOTERM_MF_FAT	GO:0030554~adenyl nucleotide binding	19	7.42188	0.346622	191641_S_AT,190043_S_AT,187003_AT,188971_S_AT,190671_AT,191006_S_AT,AFFX-CE_ACTIN_M_S_AT,185480_S_AT,190859_S_AT,188289_S_AT,190958_S_AT,AFFX-CE_ACTIN_5_F_AT,193007_S_AT,192822_S_AT,188453_AT,189054_AT,189818_AT,AFFX-R2-13514-3_S_AT,171941_S_AT,191759_AT,189402_S_AT,AFFX-R2-13514-5_X_AT,193857_S_AT,187806_S_AT	108	1009	6686	1.16575	1	0.967898	99.5219
GOTERM_MF_FAT	GO:0001883~purine nucleoside binding	19	7.42188	0.348256	191641_S_AT,190043_S_AT,187003_AT,188971_S_AT,190671_AT,191006_S_AT,AFFX-CE_ACTIN_M_S_AT,185480_S_AT,190859_S_AT,188289_S_AT,190958_S_AT,AFFX-CE_ACTIN_5_F_AT,193007_S_AT,192822_S_AT,188453_AT,189054_AT,189818_AT,AFFX-R2-13514-3_S_AT,171941_S_AT,191759_AT,189402_S_AT,AFFX-R2-13514-5_X_AT,193857_S_AT,187806_S_AT	108	1010	6686	1.16459	1	0.964065	99.5367
SP_PIR_KEYWORDS	nucleotide-binding	13	5.07812	0.356284	192101_AT,190043_S_AT,188971_S_AT,191006_S_AT,AFFX-CE_ACTIN_M_S_AT,188289_S_AT,AFFX-CE_ACTIN_5_F_AT,190958_S_AT,193007_S_AT,192822_S_AT,188453_AT,189054_AT,189818_AT,AFFX-R2-13514-3_S_AT,171941_S_AT,189402_S_AT,AFFX-R2-13514-5_X_AT,193857_S_AT	251	824	19674	1.23662	1	0.845069	99.3955
GOTERM_MF_FAT	GO:0001882~nucleoside binding	19	7.42188	0.359747	191641_S_AT,190043_S_AT,187003_AT,188971_S_AT,190671_AT,191006_S_AT,AFFX-CE_ACTIN_M_S_AT,185480_S_AT,190859_S_AT,188289_S_AT,190958_S_AT,AFFX-CE_ACTIN_5_F_AT,193007_S_AT,192822_S_AT,188453_AT,189054_AT,189818_AT,AFFX-R2-13514-3_S_AT,171941_S_AT,191759_AT,189402_S_AT,AFFX-R2-13514-5_X_AT,193857_S_AT,187806_S_AT	108	1017	6686	1.15658	1	0.964419	99.6294
GOTERM_MF_FAT	GO:0032555~purine ribonucleotide binding	20	7.8125	0.429494	191641_S_AT,188971_S_AT,190859_S_AT,AFFX-CE_ACTIN_5_F_AT,190958_S_AT,188289_S_AT,193007_S_AT,AFFX-R2-13514-3_S_AT,189818_AT,189402_S_AT,AFFX-R2-13514-5_X_AT,193857_S_AT,192101_AT,187003_AT,190043_S_AT,190671_AT,AFFX-CE_ACTIN_M_S_AT,191006_S_AT,185480_S_AT,192262_AT,189054_AT,188453_AT,192822_S_AT,171941_S_AT,187806_S_AT	108	1120	6686	1.10549	1	0.982558	99.9129
GOTERM_MF_FAT	GO:0032553~ribonucleotide binding	20	7.8125	0.429494	191641_S_AT,188971_S_AT,190859_S_AT,AFFX-CE_ACTIN_5_F_AT,190958_S_AT,188289_S_AT,193007_S_AT,AFFX-R2-13514-3_S_AT,189818_AT,189402_S_AT,AFFX-R2-13514-5_X_AT,193857_S_AT,192101_AT,187003_AT,190043_S_AT,190671_AT,AFFX-CE_ACTIN_M_S_AT,191006_S_AT,185480_S_AT,192262_AT,189054_AT,188453_AT,192822_S_AT,171941_S_AT,187806_S_AT	108	1120	6686	1.10549	1	0.982558	99.9129
GOTERM_MF_FAT	GO:0000166~nucleotide binding	24	9.375	0.434369	191641_S_AT,188971_S_AT,172697_X_AT,190859_S_AT,188289_S_AT,AFFX-CE_ACTIN_5_F_AT,190958_S_AT,193007_S_AT,AFFX-R2-13514-3_S_AT,189818_AT,189402_S_AT,AFFX-R2-13514-5_X_AT,189584_S_AT,193857_S_AT,192101_AT,190043_S_AT,187003_AT,173882_S_AT,190671_AT,191006_S_AT,AFFX-CE_ACTIN_M_S_AT,185480_S_AT,192262_AT,189054_AT,188453_AT,192822_S_AT,171941_S_AT,191759_AT,187806_S_AT	108	1369	6686	1.0853	1	0.981109	99.9218
GOTERM_MF_FAT	GO:0017076~purine nucleotide binding	21	8.20312	0.438578	191641_S_AT,188971_S_AT,190859_S_AT,AFFX-CE_ACTIN_5_F_AT,190958_S_AT,188289_S_AT,193007_S_AT,AFFX-R2-13514-3_S_AT,189818_AT,189402_S_AT,AFFX-R2-13514-5_X_AT,193857_S_AT,192101_AT,187003_AT,190043_S_AT,190671_AT,AFFX-CE_ACTIN_M_S_AT,191006_S_AT,185480_S_AT,192262_AT,189054_AT,188453_AT,192822_S_AT,171941_S_AT,191759_AT,187806_S_AT	108	1187	6686	1.09524	1	0.979494	99.9288
GOTERM_MF_FAT	GO:0005524~ATP binding	17	6.64062	0.439984	190043_S_AT,187003_AT,188971_S_AT,190671_AT,191006_S_AT,AFFX-CE_ACTIN_M_S_AT,185480_S_AT,190859_S_AT,188289_S_AT,190958_S_AT,AFFX-CE_ACTIN_5_F_AT,193007_S_AT,192822_S_AT,188453_AT,189054_AT,189818_AT,AFFX-R2-13514-3_S_AT,171941_S_AT,189402_S_AT,AFFX-R2-13514-5_X_AT,193857_S_AT,187806_S_AT	108	942	6686	1.11722	1	0.977131	99.931
Annotation Cluster 19	Enrichment Score: 0.4333705731273095
Category	Term	Count	%	PValue	Genes	List Total	Pop Hits	Pop Total	Fold Enrichment	Bonferroni	Benjamini	FDR
GOTERM_CC_FAT	GO:0043232~intracellular non-membrane-bounded organelle	11	4.29688	0.101786	190436_AT,190043_S_AT,172685_X_AT,172823_X_AT,182844_S_AT,AFFX-CE_ACTIN_M_S_AT,192280_S_AT,172758_X_AT,AFFX-CE_ACTIN_5_F_AT,172871_X_AT,190307_S_AT,AFFX-R2-13514-3_S_AT,181736_S_AT,172761_X_AT,172874_X_AT,174791_S_AT,AFFX-R2-13514-5_X_AT,173448_S_AT,172899_X_AT,172891_X_AT,172702_X_AT,172851_X_AT	95	535	7912	1.71239	0.996618	0.508932	64.9126
GOTERM_CC_FAT	GO:0043228~non-membrane-bounded organelle	11	4.29688	0.101786	190436_AT,190043_S_AT,172685_X_AT,172823_X_AT,182844_S_AT,AFFX-CE_ACTIN_M_S_AT,192280_S_AT,172758_X_AT,AFFX-CE_ACTIN_5_F_AT,172871_X_AT,190307_S_AT,AFFX-R2-13514-3_S_AT,181736_S_AT,172761_X_AT,172874_X_AT,174791_S_AT,AFFX-R2-13514-5_X_AT,173448_S_AT,172899_X_AT,172891_X_AT,172702_X_AT,172851_X_AT	95	535	7912	1.71239	0.996618	0.508932	64.9126
GOTERM_BP_FAT	GO:0040007~growth	23	8.98438	0.331806	190436_AT,172685_X_AT,188971_S_AT,182844_S_AT,190353_S_AT,192910_S_AT,192280_S_AT,188137_S_AT,187910_AT,172758_X_AT,188289_S_AT,AFFX-CE_ACTIN_5_F_AT,172871_X_AT,190307_S_AT,AFFX-R2-13514-3_S_AT,172874_X_AT,AFFX-R2-13514-5_X_AT,174791_S_AT,172899_X_AT,172851_X_AT,183771_AT,190043_S_AT,AFFX-CE_ACTIN_M_S_AT,172823_X_AT,183157_S_AT,191831_S_AT,192822_S_AT,188453_AT,176873_S_AT,191910_AT,192186_AT,172…	115	1364	7838	1.14927	1	0.945811	99.62
GOTERM_BP_FAT	GO:0009792~embryonic development ending in birth or egg hatching	40	15.625	0.474859	179523_AT,179892_AT,172400_X_AT,172697_X_AT,194255_X_AT,192280_S_AT,190859_S_AT,183621_AT,189818_AT,188113_S_AT,174791_S_AT,193857_S_AT,183771_AT,173882_S_AT,187003_AT,187997_S_AT,172823_X_AT,AFFX-CE_ACTIN_M_S_AT,190101_S_AT,183157_S_AT,191831_S_AT,188536_S_AT,192822_S_AT,192079_S_AT,176873_S_AT,172891_X_AT,190848_AT,172685_X_AT,188971_S_AT,182844_S_AT,190353_S_AT,192910_S_AT,181091_AT,188137_S_A…	115	2629	7838	1.037	1	0.984632	99.9864
GOTERM_BP_FAT	GO:0002119~nematode larval development	23	8.98438	0.822266	190436_AT,172685_X_AT,188971_S_AT,182844_S_AT,190353_S_AT,192910_S_AT,192280_S_AT,188137_S_AT,172758_X_AT,188289_S_AT,AFFX-CE_ACTIN_5_F_AT,172871_X_AT,190307_S_AT,AFFX-R2-13514-3_S_AT,172874_X_AT,AFFX-R2-13514-5_X_AT,174791_S_AT,172899_X_AT,172851_X_AT,183771_AT,190043_S_AT,190671_AT,AFFX-CE_ACTIN_M_S_AT,172823_X_AT,183157_S_AT,191831_S_AT,188536_S_AT,192822_S_AT,188453_AT,176873_S_AT,191910_AT,1…	115	1760	7838	0.890682	1	0.999637	100
GOTERM_BP_FAT	GO:0002164~larval development	23	8.98438	0.823106	190436_AT,172685_X_AT,188971_S_AT,182844_S_AT,190353_S_AT,192910_S_AT,192280_S_AT,188137_S_AT,172758_X_AT,188289_S_AT,AFFX-CE_ACTIN_5_F_AT,172871_X_AT,190307_S_AT,AFFX-R2-13514-3_S_AT,172874_X_AT,AFFX-R2-13514-5_X_AT,174791_S_AT,172899_X_AT,172851_X_AT,183771_AT,190043_S_AT,190671_AT,AFFX-CE_ACTIN_M_S_AT,172823_X_AT,183157_S_AT,191831_S_AT,188536_S_AT,192822_S_AT,188453_AT,176873_S_AT,191910_AT,1…	115	1761	7838	0.890176	1	0.999609	100
GOTERM_BP_FAT	GO:0009791~post-embryonic development	23	8.98438	0.837752	190436_AT,172685_X_AT,188971_S_AT,182844_S_AT,190353_S_AT,192910_S_AT,192280_S_AT,188137_S_AT,172758_X_AT,188289_S_AT,AFFX-CE_ACTIN_5_F_AT,172871_X_AT,190307_S_AT,AFFX-R2-13514-3_S_AT,172874_X_AT,AFFX-R2-13514-5_X_AT,174791_S_AT,172899_X_AT,172851_X_AT,183771_AT,190043_S_AT,190671_AT,AFFX-CE_ACTIN_M_S_AT,172823_X_AT,183157_S_AT,191831_S_AT,188536_S_AT,192822_S_AT,188453_AT,176873_S_AT,191910_AT,1…	115	1779	7838	0.881169	1	0.999709	100
Annotation Cluster 20	Enrichment Score: 0.2923416023584312
Category	Term	Count	%	PValue	Genes	List Total	Pop Hits	Pop Total	Fold Enrichment	Bonferroni	Benjamini	FDR
SP_PIR_KEYWORDS	transit peptide	3	1.17188	0.317356	AFFX-R2-18565-5_X_AT,192617_AT,192910_S_AT,AFFX-CE_GAPDH_5_S_AT,AFFX-CE_GAPDH_3_S_AT,AFFX-R2-18565-3_X_AT	251	90	19674	2.61275	1	0.812118	98.8056
UP_SEQ_FEATURE	transit peptide:Mitochondrion	3	1.17188	0.457424	AFFX-R2-18565-5_X_AT,192617_AT,192910_S_AT,AFFX-CE_GAPDH_5_S_AT,AFFX-CE_GAPDH_3_S_AT,AFFX-R2-18565-3_X_AT	57	89	3249	1.92135	1	1	99.9512
SP_PIR_KEYWORDS	mitochondrion	3	1.17188	0.629065	AFFX-R2-18565-5_X_AT,192617_AT,192910_S_AT,AFFX-CE_GAPDH_5_S_AT,AFFX-CE_GAPDH_3_S_AT,AFFX-R2-18565-3_X_AT	251	167	19674	1.40807	1	0.972637	99.999
GOTERM_CC_FAT	GO:0005739~mitochondrion	3	1.17188	0.741434	AFFX-R2-18565-5_X_AT,192617_AT,192910_S_AT,AFFX-CE_GAPDH_5_S_AT,AFFX-CE_GAPDH_3_S_AT,AFFX-R2-18565-3_X_AT	95	220	7912	1.13569	1	0.998522	99.9998
Annotation Cluster 21	Enrichment Score: 0.25290190605370605
Category	Term	Count	%	PValue	Genes	List Total	Pop Hits	Pop Total	Fold Enrichment	Bonferroni	Benjamini	FDR
GOTERM_BP_FAT	GO:0048581~negative regulation of post-embryonic development	3	1.17188	0.477803	192101_AT,185969_S_AT,183157_S_AT	115	110	7838	1.85881	1	0.984086	99.9874
GOTERM_BP_FAT	GO:0040027~negative regulation of vulval development	3	1.17188	0.477803	192101_AT,185969_S_AT,183157_S_AT	115	110	7838	1.85881	1	0.984086	99.9874
GOTERM_BP_FAT	GO:0048580~regulation of post-embryonic development	3	1.17188	0.653051	192101_AT,185969_S_AT,183157_S_AT	115	152	7838	1.34519	1	0.998009	100
GOTERM_BP_FAT	GO:0040028~regulation of vulval development	3	1.17188	0.653051	192101_AT,185969_S_AT,183157_S_AT	115	152	7838	1.34519	1	0.998009	100
Annotation Cluster 22	Enrichment Score: 0.19585871543985775
Category	Term	Count	%	PValue	Genes	List Total	Pop Hits	Pop Total	Fold Enrichment	Bonferroni	Benjamini	FDR
INTERPRO	IPR008271:Serine/threonine protein kinase, active site	6	2.34375	0.159133	189054_AT,189818_AT,190671_AT,191006_S_AT,185480_S_AT,190859_S_AT	185	212	13633	2.08562	1	0.954192	90.5409
INTERPRO	IPR017442:Serine/threonine protein kinase-related	5	1.95312	0.482453	189818_AT,190671_AT,191006_S_AT,185480_S_AT,190859_S_AT	185	265	13633	1.39041	1	0.99996	99.9872
INTERPRO	IPR000719:Protein kinase, core	6	2.34375	0.640057	189054_AT,189818_AT,190671_AT,191006_S_AT,185480_S_AT,190859_S_AT	185	404	13633	1.09443	1	0.999999	99.9999
SP_PIR_KEYWORDS	serine/threonine-protein kinase	3	1.17188	0.648177	189054_AT,189818_AT,191006_S_AT	251	173	19674	1.35923	1	0.974908	99.9995
GOTERM_MF_FAT	GO:0004713~protein tyrosine kinase activity	6	2.34375	0.668993	189054_AT,189818_AT,190671_AT,191006_S_AT,185480_S_AT,190859_S_AT	108	351	6686	1.05825	1	0.997609	99.9999
GOTERM_BP_FAT	GO:0006793~phosphorus metabolic process	9	3.51562	0.762424	189054_AT,191521_S_AT,189818_AT,190671_AT,191006_S_AT,188137_S_AT,185480_S_AT,190859_S_AT,191831_S_AT	115	665	7838	0.922419	1	0.999326	100
GOTERM_BP_FAT	GO:0006796~phosphate metabolic process	9	3.51562	0.762424	189054_AT,191521_S_AT,189818_AT,190671_AT,191006_S_AT,188137_S_AT,185480_S_AT,190859_S_AT,191831_S_AT	115	665	7838	0.922419	1	0.999326	100
GOTERM_BP_FAT	GO:0016310~phosphorylation	7	2.73438	0.767133	189054_AT,189818_AT,190671_AT,191006_S_AT,188137_S_AT,185480_S_AT,190859_S_AT	115	514	7838	0.928202	1	0.999328	100
GOTERM_BP_FAT	GO:0006468~protein amino acid phosphorylation	6	2.34375	0.769746	189054_AT,189818_AT,190671_AT,191006_S_AT,185480_S_AT,190859_S_AT	115	437	7838	0.935787	1	0.999301	100
GOTERM_MF_FAT	GO:0004674~protein serine/threonine kinase activity	6	2.34375	0.807927	189054_AT,189818_AT,190671_AT,191006_S_AT,185480_S_AT,190859_S_AT	108	418	6686	0.888623	1	0.999642	100
GOTERM_MF_FAT	GO:0004672~protein kinase activity	6	2.34375	0.853245	189054_AT,189818_AT,190671_AT,191006_S_AT,185480_S_AT,190859_S_AT	108	448	6686	0.829117	1	0.999878	100
INTERPRO	IPR017441:Protein kinase, ATP binding site	3	1.17188	0.885297	189054_AT,189818_AT,191006_S_AT	185	272	13633	0.812778	1	1	100
Annotation Cluster 23	Enrichment Score: 0.19202424333619159
Category	Term	Count	%	PValue	Genes	List Total	Pop Hits	Pop Total	Fold Enrichment	Bonferroni	Benjamini	FDR
GOTERM_MF_FAT	GO:0008237~metallopeptidase activity	5	1.95312	0.299925	180453_AT,191832_AT,190057_S_AT,190244_S_AT,174371_AT,190101_S_AT	108	173	6686	1.78923	1	0.962143	98.8627
GOTERM_MF_FAT	GO:0004222~metalloendopeptidase activity	3	1.17188	0.529019	191832_AT,190057_S_AT,174371_AT,190101_S_AT	108	110	6686	1.68838	1	0.985372	99.9922
GOTERM_MF_FAT	GO:0070011~peptidase activity, acting on L-amino acid peptides	6	2.34375	0.742102	190619_AT,180453_AT,191832_AT,190057_S_AT,190244_S_AT,174371_AT,190101_S_AT	108	383	6686	0.969829	1	0.999256	100
GOTERM_MF_FAT	GO:0004175~endopeptidase activity	4	1.5625	0.786017	190619_AT,191832_AT,190057_S_AT,174371_AT,190101_S_AT	108	257	6686	0.963539	1	0.99966	100
GOTERM_MF_FAT	GO:0008233~peptidase activity	6	2.34375	0.801132	190619_AT,180453_AT,191832_AT,190057_S_AT,190244_S_AT,174371_AT,190101_S_AT	108	414	6686	0.897209	1	0.99965	100
GOTERM_BP_FAT	GO:0006508~proteolysis	5	1.95312	0.950101	190619_AT,180453_AT,191832_AT,190244_S_AT,174371_AT,190101_S_AT	115	520	7838	0.655351	1	0.999993	100
Annotation Cluster 24	Enrichment Score: 0.1364804794337373
Category	Term	Count	%	PValue	Genes	List Total	Pop Hits	Pop Total	Fold Enrichment	Bonferroni	Benjamini	FDR
GOTERM_BP_FAT	GO:0022402~cell cycle process	5	1.95312	0.640568	190043_S_AT,179892_AT,AFFX-R2-13514-3_S_AT,187996_S_AT,AFFX-CE_ACTIN_M_S_AT,187525_S_AT,AFFX-R2-13514-5_X_AT,193857_S_AT,AFFX-CE_ACTIN_5_F_AT	115	300	7838	1.13594	1	0.997773	99.9999
GOTERM_BP_FAT	GO:0007126~meiosis	3	1.17188	0.67392	179892_AT,187996_S_AT,193857_S_AT	115	158	7838	1.29411	1	0.998312	100
GOTERM_BP_FAT	GO:0051327~M phase of meiotic cell cycle	3	1.17188	0.677298	179892_AT,187996_S_AT,193857_S_AT	115	159	7838	1.28597	1	0.998248	100
GOTERM_BP_FAT	GO:0051321~meiotic cell cycle	3	1.17188	0.69698	179892_AT,187996_S_AT,193857_S_AT	115	165	7838	1.23921	1	0.998205	100
GOTERM_BP_FAT	GO:0007049~cell cycle	5	1.95312	0.711325	190043_S_AT,179892_AT,AFFX-R2-13514-3_S_AT,187996_S_AT,AFFX-CE_ACTIN_M_S_AT,187525_S_AT,AFFX-R2-13514-5_X_AT,193857_S_AT,AFFX-CE_ACTIN_5_F_AT	115	329	7838	1.03581	1	0.998479	100
GOTERM_BP_FAT	GO:0000279~M phase	3	1.17188	0.872158	179892_AT,187996_S_AT,193857_S_AT	115	242	7838	0.844916	1	0.999832	100
GOTERM_BP_FAT	GO:0022403~cell cycle phase	3	1.17188	0.876598	179892_AT,187996_S_AT,193857_S_AT	115	245	7838	0.83457	1	0.99984	100
Annotation Cluster 25	Enrichment Score: 0.12313928093122295
Category	Term	Count	%	PValue	Genes	List Total	Pop Hits	Pop Total	Fold Enrichment	Bonferroni	Benjamini	FDR
GOTERM_BP_FAT	GO:0040018~positive regulation of multicellular organism growth	5	1.95312	0.695213	192822_S_AT,188453_AT,191000_S_AT,189578_AT,188289_S_AT	115	322	7838	1.05833	1	0.998308	100
GOTERM_BP_FAT	GO:0051240~positive regulation of multicellular organismal process	5	1.95312	0.713576	192822_S_AT,188453_AT,191000_S_AT,189578_AT,188289_S_AT	115	330	7838	1.03267	1	0.998403	100
GOTERM_BP_FAT	GO:0040014~regulation of multicellular organism growth	5	1.95312	0.861042	192822_S_AT,188453_AT,191000_S_AT,189578_AT,188289_S_AT	115	415	7838	0.821163	1	0.999802	100
Annotation Cluster 26	Enrichment Score: 0.09294168038776077
Category	Term	Count	%	PValue	Genes	List Total	Pop Hits	Pop Total	Fold Enrichment	Bonferroni	Benjamini	FDR
SMART	SM00034:CLECT	3	1.17188	0.771697	192509_AT,177187_AT,188823_S_AT	62	251	5537	1.06741	1	1	100
INTERPRO	IPR016186:C-type lectin-like	3	1.17188	0.796518	192509_AT,177187_AT,188823_S_AT	185	218	13633	1.01411	1	1	100
INTERPRO	IPR001304:C-type lectin	3	1.17188	0.856115	192509_AT,177187_AT,188823_S_AT	185	251	13633	0.88078	1	1	100
Annotation Cluster 27	Enrichment Score: 0.07696523727972976
Category	Term	Count	%	PValue	Genes	List Total	Pop Hits	Pop Total	Fold Enrichment	Bonferroni	Benjamini	FDR
GOTERM_BP_FAT	GO:0040035~hermaphrodite genitalia development	9	3.51562	0.797345	192101_AT,190043_S_AT,172823_X_AT,AFFX-CE_ACTIN_M_S_AT,192910_S_AT,172758_X_AT,AFFX-CE_ACTIN_5_F_AT,188289_S_AT,188453_AT,192822_S_AT,190307_S_AT,AFFX-R2-13514-3_S_AT,172761_X_AT,AFFX-R2-13514-5_X_AT,172891_X_AT,172702_X_AT	115	690	7838	0.888998	1	0.999545	100
GOTERM_BP_FAT	GO:0048806~genitalia development	9	3.51562	0.805141	192101_AT,190043_S_AT,172823_X_AT,AFFX-CE_ACTIN_M_S_AT,192910_S_AT,172758_X_AT,AFFX-CE_ACTIN_5_F_AT,188289_S_AT,188453_AT,192822_S_AT,190307_S_AT,AFFX-R2-13514-3_S_AT,172761_X_AT,AFFX-R2-13514-5_X_AT,172891_X_AT,172702_X_AT	115	696	7838	0.881334	1	0.999541	100
GOTERM_BP_FAT	GO:0003006~reproductive developmental process	10	3.90625	0.866717	192101_AT,190043_S_AT,172823_X_AT,AFFX-CE_ACTIN_M_S_AT,192910_S_AT,172758_X_AT,AFFX-CE_ACTIN_5_F_AT,188289_S_AT,188453_AT,192822_S_AT,190307_S_AT,AFFX-R2-13514-3_S_AT,172761_X_AT,187525_S_AT,AFFX-R2-13514-5_X_AT,172891_X_AT,172702_X_AT	115	831	7838	0.820175	1	0.999818	100
GOTERM_BP_FAT	GO:0007548~sex differentiation	9	3.51562	0.884593	192101_AT,190043_S_AT,172823_X_AT,AFFX-CE_ACTIN_M_S_AT,192910_S_AT,172758_X_AT,AFFX-CE_ACTIN_5_F_AT,188289_S_AT,188453_AT,192822_S_AT,190307_S_AT,AFFX-R2-13514-3_S_AT,172761_X_AT,AFFX-R2-13514-5_X_AT,172891_X_AT,172702_X_AT	115	771	7838	0.795601	1	0.999867	100
Annotation Cluster 28	Enrichment Score: 0.07680673064887915
Category	Term	Count	%	PValue	Genes	List Total	Pop Hits	Pop Total	Fold Enrichment	Bonferroni	Benjamini	FDR
SP_PIR_KEYWORDS	transmembrane	15	5.85938	0.699783	186182_S_AT,192076_AT,174220_AT,187997_S_AT,187493_AT,188971_S_AT,182844_S_AT,192910_S_AT,188289_S_AT,192357_AT,193007_S_AT,187571_AT,180913_AT,192175_AT,174791_S_AT,192059_AT	251	1227	19674	0.958221	1	0.982072	99.9999
SP_PIR_KEYWORDS	membrane	12	4.6875	0.873416	186182_S_AT,174220_AT,187493_AT,188971_S_AT,182844_S_AT,192910_S_AT,188289_S_AT,193007_S_AT,187571_AT,192175_AT,173448_S_AT,174791_S_AT,192059_AT	251	1154	19674	0.815069	1	0.998069	100
UP_SEQ_FEATURE	transmembrane region	8	3.125	0.962487	186182_S_AT,174220_AT,192175_AT,187493_AT,182844_S_AT,192910_S_AT,174791_S_AT,187571_AT,193007_S_AT	57	674	3249	0.676558	1	1	100
Annotation Cluster 29	Enrichment Score: 0.07399661437135317
Category	Term	Count	%	PValue	Genes	List Total	Pop Hits	Pop Total	Fold Enrichment	Bonferroni	Benjamini	FDR
GOTERM_BP_FAT	GO:0018991~oviposition	4	1.5625	0.793861	190436_AT,172823_X_AT,191000_S_AT,187910_AT	115	287	7838	0.949917	1	0.999552	100
GOTERM_BP_FAT	GO:0033057~reproductive behavior in a multicellular organism	4	1.5625	0.801584	190436_AT,172823_X_AT,191000_S_AT,187910_AT	115	291	7838	0.936859	1	0.999546	100
GOTERM_BP_FAT	GO:0019098~reproductive behavior	4	1.5625	0.809067	190436_AT,172823_X_AT,191000_S_AT,187910_AT	115	295	7838	0.924156	1	0.999541	100
GOTERM_BP_FAT	GO:0007610~behavior	5	1.95312	0.853258	190436_AT,172823_X_AT,191000_S_AT,187910_AT,173466_S_AT	115	409	7838	0.833209	1	0.999794	100
GOTERM_BP_FAT	GO:0048609~reproductive process in a multicellular organism	5	1.95312	0.904506	190436_AT,172823_X_AT,191000_S_AT,187525_S_AT,187910_AT	115	455	7838	0.748973	1	0.999932	100
GOTERM_BP_FAT	GO:0032504~multicellular organism reproduction	5	1.95312	0.905421	190436_AT,172823_X_AT,191000_S_AT,187525_S_AT,187910_AT	115	456	7838	0.74733	1	0.999928	100
Annotation Cluster 30	Enrichment Score: 9.517308612361798E-4
Category	Term	Count	%	PValue	Genes	List Total	Pop Hits	Pop Total	Fold Enrichment	Bonferroni	Benjamini	FDR
GOTERM_BP_FAT	GO:0045449~regulation of transcription	6	2.34375	0.994215	188453_AT,190863_AT,172823_X_AT,173008_S_AT,194161_S_AT,187818_S_AT	115	817	7838	0.500537	1	1	100
GOTERM_BP_FAT	GO:0006355~regulation of transcription, DNA-dependent	3	1.17188	0.999605	188453_AT,190863_AT,173008_S_AT	115	673	7838	0.303818	1	1	100
GOTERM_BP_FAT	GO:0051252~regulation of RNA metabolic process	3	1.17188	0.999622	188453_AT,190863_AT,173008_S_AT	115	676	7838	0.30247	1	1	100
